# Supplementary material for: The effects of isolated ankle strengthening and functional balance training on strength, running mechanics, postural control and injury prevention in novice runners: design of a randomized controlled trial
Source: PubMed Central journal article supplement (PMC4295291; doi:10.1186/1471-2474-15-407), 2014-12-04

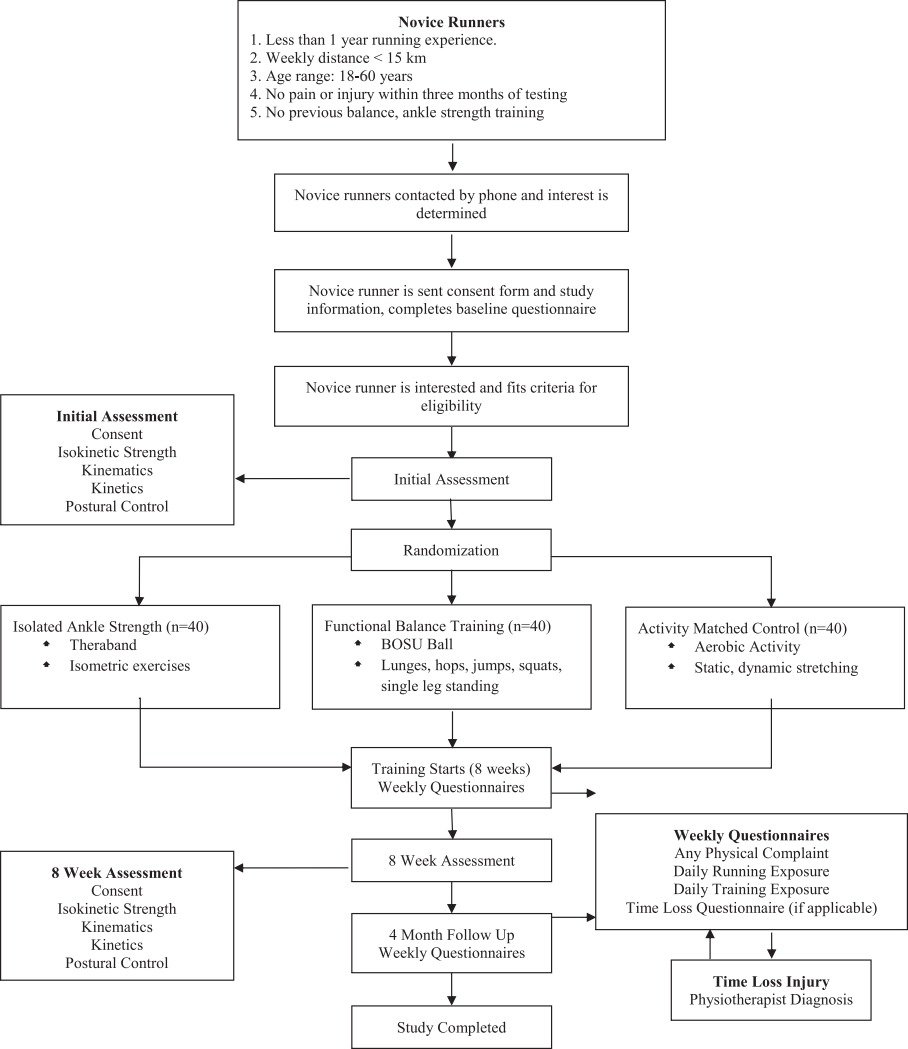

Supplement: 12891_2014_2391_MOESM1_ESM.pdf [file 12891_2014_2391_MOESM1_ESM.pdf]
