# Supplementary material for: The effects of isolated ankle strengthening and functional balance training on strength, running mechanics, postural control and injury prevention in novice runners: design of a randomized controlled trial
Source: PubMed Central journal article supplement (PMC4295291; doi:10.1186/1471-2474-15-407), 2014-12-04
Supplement: 12891_2014_2391_MOESM2_ESM.pdf [file 12891_2014_2391_MOESM2_ESM.pdf]

| Category                                                                                                                                                                                   |                                  | Movement                                                                                                                                                                                    |                                  |                                                                                                                                                                                             |                                   | Duration                                                                                                                                                                                     |                                   |
|--------------------------------------------------------------------------------------------------------------------------------------------------------------------------------------------|----------------------------------|---------------------------------------------------------------------------------------------------------------------------------------------------------------------------------------------|----------------------------------|---------------------------------------------------------------------------------------------------------------------------------------------------------------------------------------------|-----------------------------------|----------------------------------------------------------------------------------------------------------------------------------------------------------------------------------------------|-----------------------------------|
| Aerobic                                                                                                                                                                                    |                                  | Side-to-side shuttle, high knee skipping, light running                                                                                                                                     |                                  |                                                                                                                                                                                             |                                   | 1 min                                                                                                                                                                                        |                                   |
| Static Stretch                                                                                                                                                                             |                                  | groin, hamstrings, quadriceps, calves (30 seconds each)                                                                                                                                     |                                  |                                                                                                                                                                                             |                                   | 2 min                                                                                                                                                                                        |                                   |
| Dynamic Stretch                                                                                                                                                                            |                                  | Buttock Kicks – 1 minutes                                                                                                                                                                   |                                  |                                                                                                                                                                                             |                                   | 2 min                                                                                                                                                                                        |                                   |
|                                                                                                                                                                                            |                                  | Leg Swings – Side, 30 seconds                                                                                                                                                               |                                  |                                                                                                                                                                                             |                                   |                                                                                                                                                                                              |                                   |
|                                                                                                                                                                                            |                                  | Leg Swings – Front, 30 seconds                                                                                                                                                              |                                  |                                                                                                                                                                                             |                                   |                                                                                                                                                                                              |                                   |
|                                                                                                                                                                                            |                                  | Total Time                                                                                                                                                                                  |                                  |                                                                                                                                                                                             |                                   | 5 min                                                                                                                                                                                        |                                   |
| Strength Weeks 1,2                                                                                                                                                                         |                                  | Strength Weeks 3,4                                                                                                                                                                          |                                  | Strength Weeks 5,6                                                                                                                                                                          |                                   | Strength Weeks 7,8                                                                                                                                                                           |                                   |
| Movement                                                                                                                                                                                   | Reps                             | Movement                                                                                                                                                                                    | Reps                             | Movement                                                                                                                                                                                    | Reps                              | Movement                                                                                                                                                                                     | Reps                              |
| Theraband:<br>Red Band<br><br>                                                                             | 4 sets of 10                     | Theraband:<br>Green Band<br><br>                                                                           | 4 sets of 10                     | Theraband:<br>Blue Band<br><br>                                                                            | 4 sets of 10                      | Theraband:<br>Black Band<br><br>                                                                           | 4 sets of 10                      |
| Isometric:<br>Push against wall,<br>inversion,<br>eversion,<br>dorsi flexion,<br>plantar flexion<br><br> | 3 sets, 5 seconds each direction | Isometric:<br>Push against wall,<br>inversion,<br>eversion,<br>dorsi flexion,<br>plantar flexion<br><br> | 5 sets, 5 seconds each direction | Isometric:<br>Push against wall,<br>inversion,<br>eversion,<br>dorsi flexion,<br>plantar flexion<br><br> | 3 sets, 10 seconds each direction | Isometric:<br>Push against wall,<br>inversion,<br>eversion,<br>dorsi flexion,<br>plantar flexion<br><br> | 5 sets, 10 seconds each direction |
